# Supplementary material for: Self-organized sheaf-like Fe3O4/C hierarchical microrods with superior lithium storage properties
Source: Royal Society of Chemistry journal article supplement (doi:10.1039/c5nr00046g), 2015-01-01
Supplement: c5nr00046g1.pdf [file c5nr00046g1.pdf]

## Electronic Supplementary Information

---

### Self-organized sheaf-like Fe<sub>3</sub>O<sub>4</sub>/C hierarchical microrods with superior lithium storage properties

Fei-Xiang Ma,<sup>ab</sup> Hao Bin Wu,<sup>a</sup> Cheng-Yan Xu,<sup>b</sup> Liang Zhen,<sup>b</sup> and Xiong Wen (David) Lou<sup>\*a</sup>

<sup>a</sup> School of Chemical and Biomedical Engineering, Nanyang Technological University, 62 Nanyang Drive, Singapore, 637459. Email: [xwlou@ntu.edu.sg](mailto:xwlou@ntu.edu.sg)

<sup>b</sup> School of Materials Science and Engineering, Harbin Institute of Technology, Harbin 150001, China.

#### Experimental

*Materials Synthesis:* All chemicals were purchased from Sigma-Aldrich and used without any purification. In a typical synthesis of sheaf-like Fe<sub>3</sub>O<sub>4</sub>/C hierarchical microrods with nanowires as building blocks, 0.303 g of Fe(NO<sub>3</sub>)<sub>3</sub> · 6H<sub>2</sub>O and 0.2 g of glucose were completely dissolved into 30 ml of ethylene glycol (EG). Then the mixture was transferred into a 40 ml Teflon-lined stainless steel autoclave and heated at 220 °C for 12 h in an electric oven, followed by cooling naturally to room temperature. The resultant Fe-glycolate precursor was washed with ethanol for several times through centrifugation and dried in an oven at 70 °C overnight. Finally, the as-prepared precursor was calcined at 350 °C for 3 h with a heating rate of 1 °C min<sup>-1</sup> in N<sub>2</sub> gas flow to obtain Fe<sub>3</sub>O<sub>4</sub>/C microrods.

*Materials Characterization:* X-ray diffraction (XRD) patterns were collected using a Bruker D8 Advanced X-Ray Diffractometer. The morphology and structure of the products were characterized by field-emission scanning electron microscope (FESEM, JEOL JSM-6700F), and transmission electron microscope (TEM, JEOL JEM-2010) with an accelerating voltage of 200 kV. Thermogravimetric analysis (TGA) was performed on SDT Q600 (TA Instruments). Nitrogen adsorption-desorption was performed on Autosorb 6B at -196 °C. Raman spectrum was taken under ambient conditions by using a micro-Raman spectrometer (Reinshaw Raman Scope RM3000).

*Electrochemical Measurements:* Electrochemical measurements were carried out using two-electrode Swagelok-type cells with pure lithium foil as the counter and reference electrode at room temperature. The working electrode was prepared by pasting a mixture of active materials, super P and sodium carboxymethyl cellulose (CMC) with a weight ratio of 70:20:10 onto a copper plate. The electrodes were dried in vacuum at 70 °C for 12 h before assembling battery in an Ar-filled glovebox. The typical loading density of the active material was approximately 1.0 mg cm<sup>-2</sup>. The capacity of the electrode was calculated based on the total weight of Fe<sub>3</sub>O<sub>4</sub>/C microrods. The electrolyte was composed of 1 M LiPF<sub>6</sub> in a 50:50 w/w mixture of ethylene carbonate (EC)/dimethyl carbonate (DMC) mixture solution. Cyclic voltammetry (CV) measurement was carried out on a CHI660E electrochemical workstation. Charge-discharge measurement was performed on a Neware battery tester.

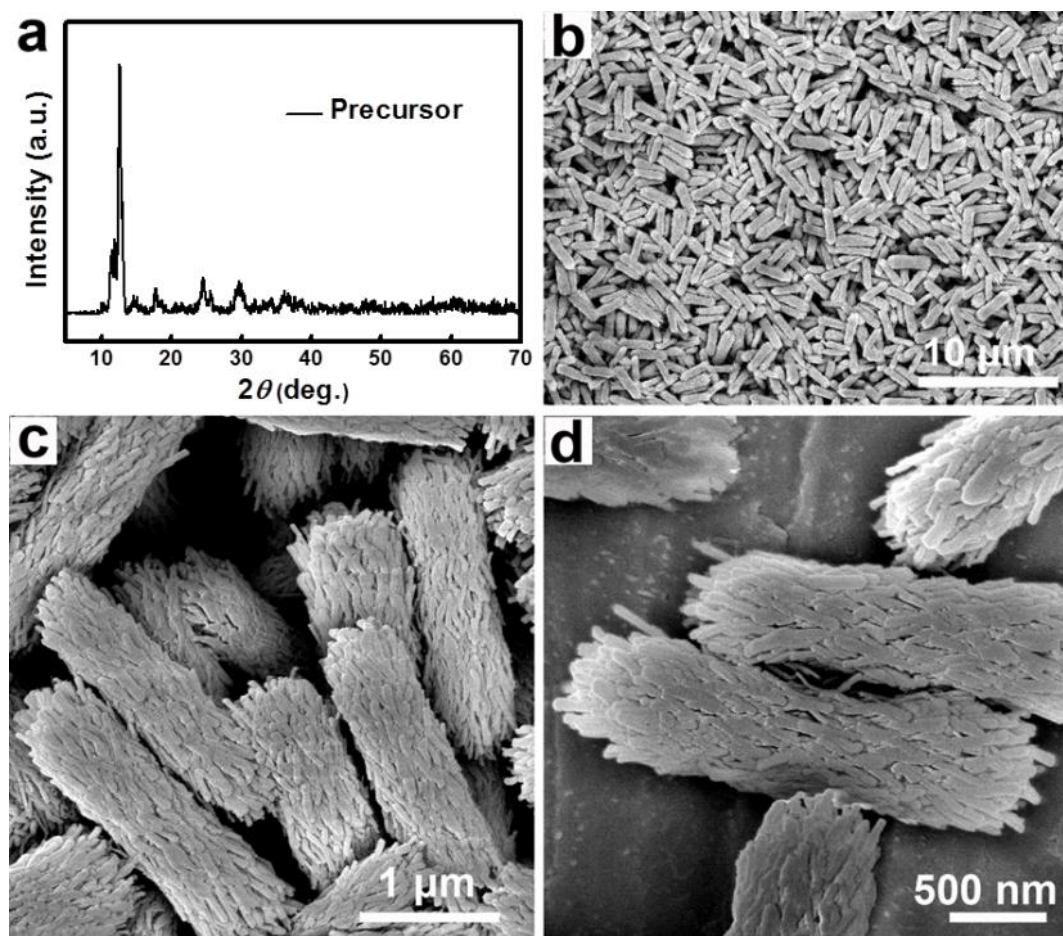

**Figure S1.** (a) XRD pattern and (b-d) FESEM images of the as-prepared Fe-glycolate precursor microrods.

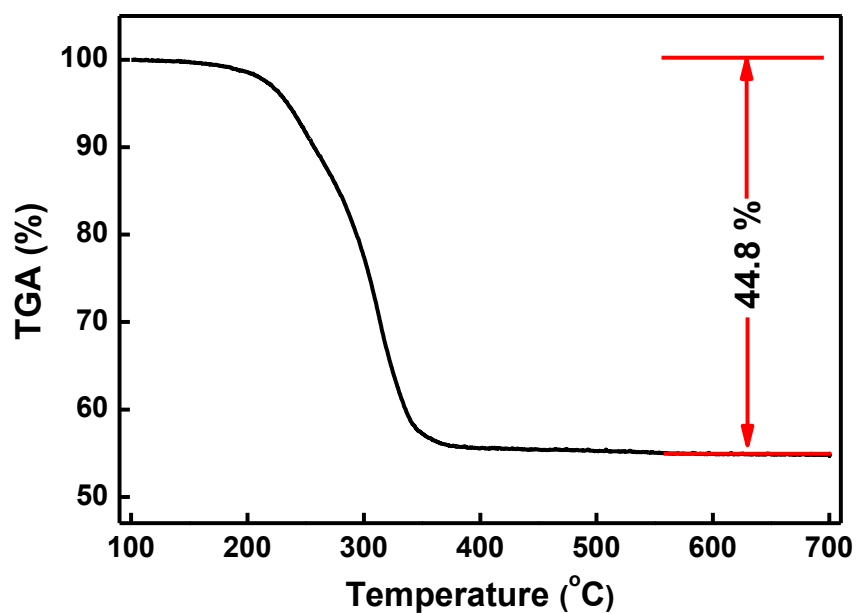

**Figure S2.** TGA curve of the as-prepared Fe-glycolate precursor from 100 to 700 °C under  $N_2$  gas flow with a temperature ramp of  $10\text{ }^{\circ}\text{C min}^{-1}$ .

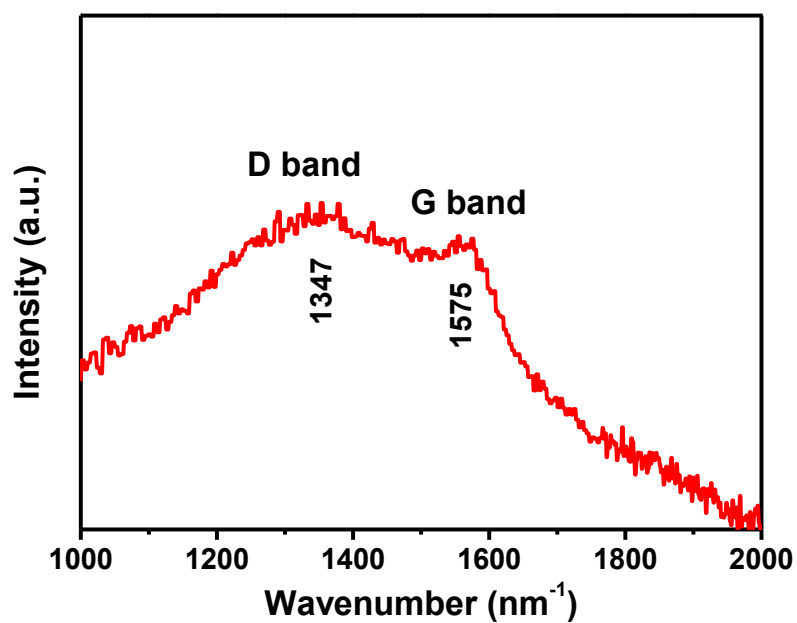

**Figure S3.** Raman spectrum of the as-prepared  $Fe_3O_4/C$  microrods. The high intensity of D band relative to G band indicates the amorphous nature of the carbon material.

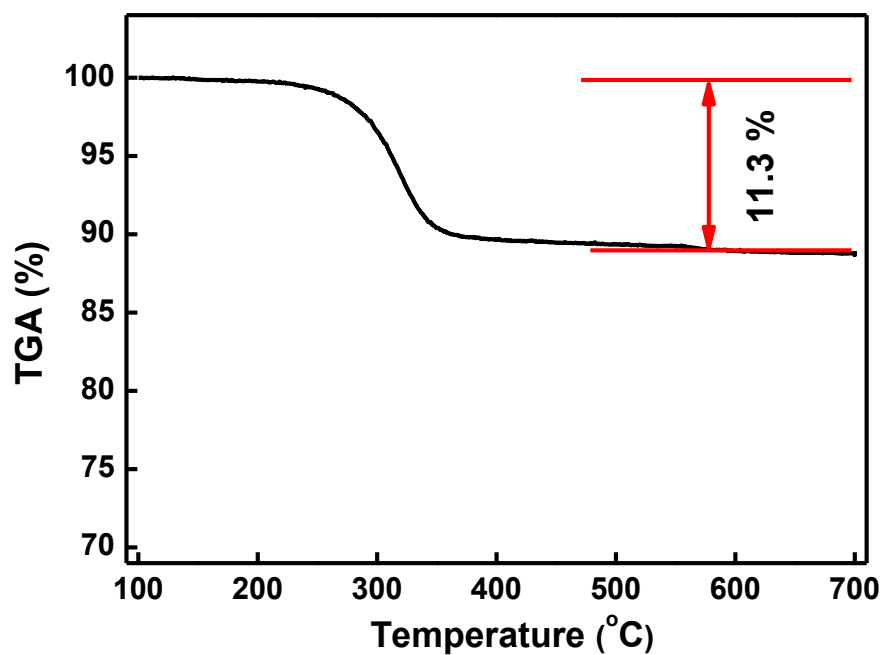

**Figure S4.** TGA curve of the as-prepared  $\text{Fe}_3\text{O}_4/\text{C}$  microrods from 100 to 700  $^{\circ}\text{C}$  under air gas flow with a temperature ramp of 10  $^{\circ}\text{C min}^{-1}$ .

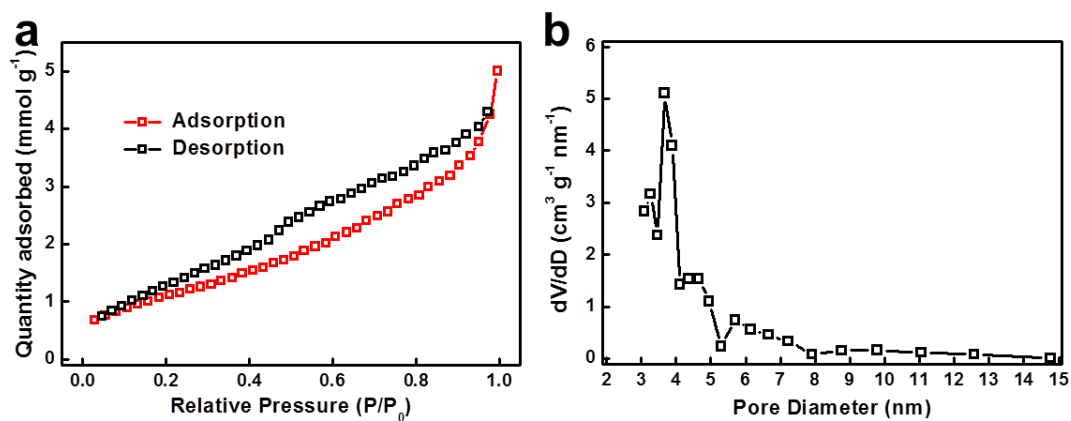

**Figure S5.** (a)  $\text{N}_2$  adsorption-desorption isotherm plots and (b) corresponding BJH pore size distribution of the  $\text{Fe}_3\text{O}_4/\text{C}$  microrods.

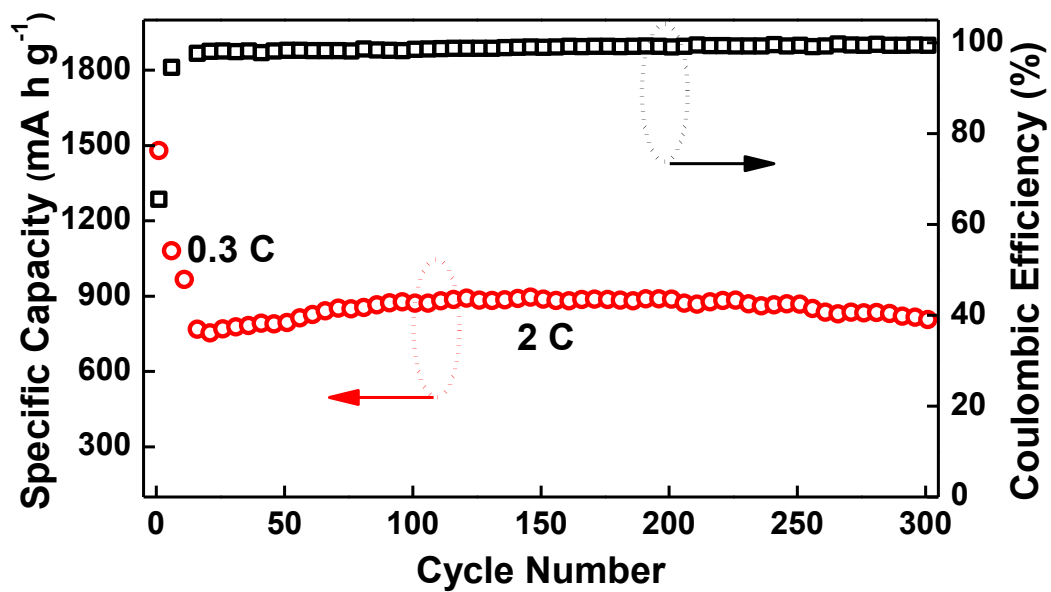

**Figure S6.** Cycling performance of the Fe<sub>3</sub>O<sub>4</sub>/C microrods electrode at a current density of 2 C (1 C=1000 mA g<sup>-1</sup>). The electrode was firstly activated at 0.3 C for the initial 10 cycles.
